# Supplementary material
Source: PubMed Central journal article supplement (PMC6413832)
Supplement: jciinsight-4-125067-s006.pdf [file jciinsight-4-125067-s006.pdf]

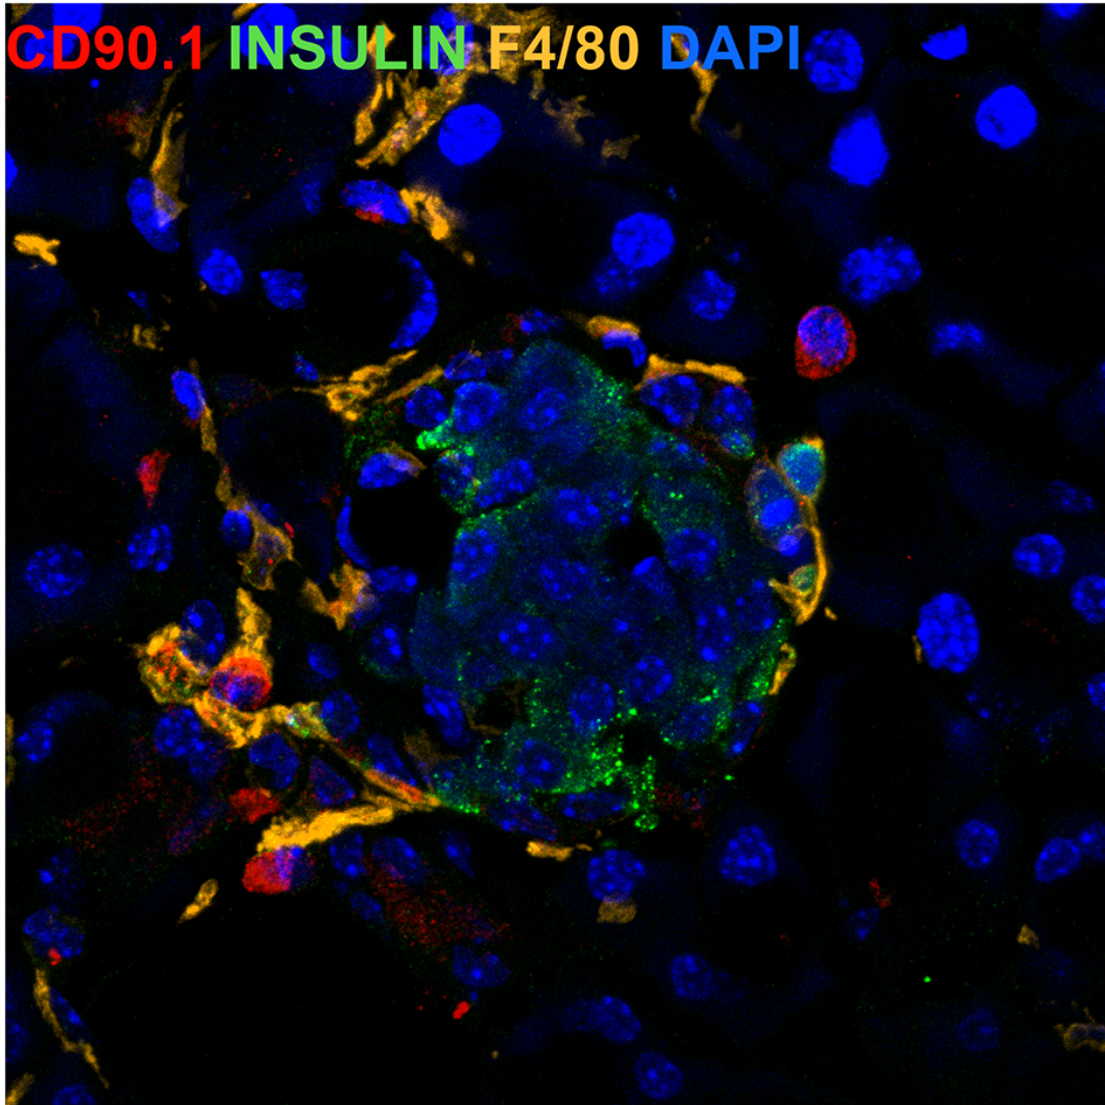

### Supplemental Figure 1

Macrophages are localized to the pancreatic islets in *Rip*-GP mice following LCMV-CL13 infection. LCMV-GP<sub>33-41</sub>-specific CD8<sup>+</sup> P14 T cells expressing the congenic marker Thy1.1 (CD90.1) were adoptively transferred into *Rip*-GP mice prior to LCMV-CL13 infection. Pancreatic tissue was isolated at day 6 p.i. and stained with antibody to insulin, CD90.1 and F4/80.
